# Supplementary material for: A phase II trial of gemcitabine and erlotinib followed by ChemoProton therapy plus capecitabine and oxaliplatin for locally advanced pancreatic cancer
Source: PubMed Central journal article supplement — J Gastrointest Oncol. 2022 Aug;13(4):1989–96. doi: 10.21037/jgo-22-327 (PMC9459205; doi:10.21037/jgo-22-327), 2022-08
Supplement: jgo-13-04-1989-dss.pdf [file jgo-13-04-1989-dss.pdf]

## Data Sharing Statement

|                     |                                                                                                                                                    |                                                                                                                                      |
|---------------------|----------------------------------------------------------------------------------------------------------------------------------------------------|--------------------------------------------------------------------------------------------------------------------------------------|
| <b>Article Info</b> | <a href="https://dx.doi.org/10.21037/jgo-22-327">https://dx.doi.org/10.21037/jgo-22-327</a>                                                        |                                                                                                                                      |
| <b>Item</b>         | <b>Question</b>                                                                                                                                    | <b>Authors' Response<br/>(place "-" if not applicable)</b>                                                                           |
| 1                   | Would you like to share data collected for your study to others?                                                                                   | Yes                                                                                                                                  |
| 2                   | If not, would you like to share the reason for your decision?                                                                                      |                                                                                                                                      |
| 3                   | What data in particular will be shared?                                                                                                            | The survival data and protocol will be shared.                                                                                       |
| 4                   | Any other documents will be share? Such as study protocol, statistical analysis plan, informed consent form, clinical study report, analytic code. | Study protocol, statistical analysis plan                                                                                            |
| 5                   | When will data availability begin?                                                                                                                 | From the publication date.                                                                                                           |
| 6                   | When will data availability end?                                                                                                                   | Two years within the publication date since the survival data may be updated over time.                                              |
| 7                   | To whom will you share the data?                                                                                                                   | Researchers including medical oncologists, surgical oncologists and radiation oncologists investigating a similar patient population |
| 8                   | For what type of analysis or purpose?                                                                                                              | For analysis of outcomes in locally advanced pancreatic patients.                                                                    |
| 9                   | How or where can the data/documents be obtained?                                                                                                   | Emails could be sent to the address below to obtain the shared data: GYang@llu.edu                                                   |
| 10                  | Any other restrictions?                                                                                                                            | We may balance the potential benefits and risks for each request and then provide the data that could be shared.                     |
